# Supplementary material for: Tiny nanoparticles of organometallic polymers through the direct disassembly-assisted synthesis strategy for hydrogen peroxide sensing
Source: Royal Society of Chemistry journal article supplement (doi:10.1039/c5py01277e), 2015-01-01
Supplement: c5py01277e1.pdf [file c5py01277e1.pdf]

# Tiny nanoparticles of organometallic polymers through direct disassembly-assisted synthesis strategy for hydrogen peroxide sensing

Guodong Liang,<sup>\*a</sup> Xiaodong Li,<sup>a</sup> Bin Fei,<sup>\*b</sup> Xiaomei Wang<sup>a</sup> and Fangming Zhu<sup>a</sup>

*<sup>a</sup>DSAP lab, PCFM lab, GDHPPC lab, School of Chemistry and Chemical Engineering, Sun Yat-Sen University, Guangzhou 510275, China; E-mail: [lgdong@mail.sysu.edu.cn](mailto:lgdong@mail.sysu.edu.cn)*

*<sup>b</sup>Institute of Textiles & Clothing, The Hong Kong Polytechnic University, Hong Kong, China.*

## Calculation of aggregation number of BEB-PB nanoparticles

Weight of material of BEB-PB nanoparticles,  $W$ , can be obtained from

$$W = V \cdot \rho \quad (1)$$

$V$  is the volume of nanoparticles, going with

$$V = \frac{\pi D^3}{6} \quad (2)$$

the diameter of BEB-PB nanoparticles is determined with TEM.

$$\rho = w_P \cdot \rho_P + w_{PB} \cdot \rho_{PB} \quad (3)$$

$w_P$  and  $w_{PB}$  are the weight percentage of BEB and PB in nanoparticles.  $\rho_P$  and  $\rho_{PB}$  are density of BEB triblock copolymer and Prussian blue, being 1.2 and 1.8 g cm<sup>-3</sup>

([http://www.chemicalbook.com/ProductChemicalPropertiesCB4134130\\_EN.htm](http://www.chemicalbook.com/ProductChemicalPropertiesCB4134130_EN.htm)),

respectively.

The number of polymers is estimated from

$$N = \frac{W \cdot (1 - w_c)}{M_{\text{BEB}}} \cdot N_0 \quad (4)$$

$M_{\text{BEB}}$  is the number-average molecular weight of BEB, being 48600 g/mol.  $N_0$  is avogadro constant.

### Electrochemical performance of bare electrodes and conventional PB particles.

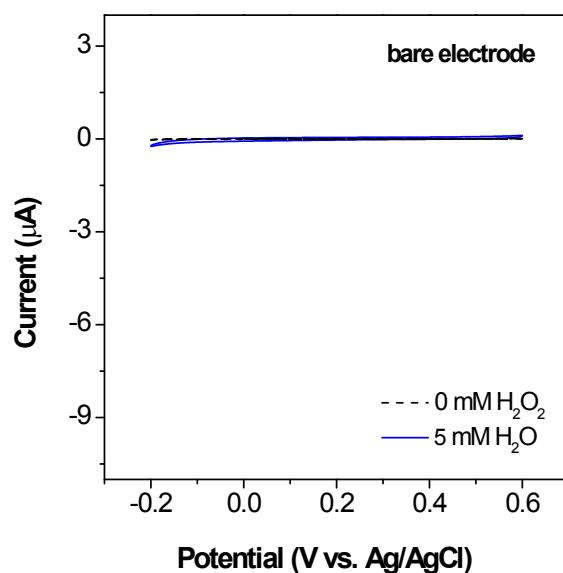

**Fig. S1** Cyclic voltammogram of bare glassy carbon electrode in 20 mM sodium phosphate buffer solution in the absence (dashed curves) and the presence of 5 mM H<sub>2</sub>O<sub>2</sub> (solid curves). Scan rate: 50 mV s<sup>-1</sup>, under N<sub>2</sub>.

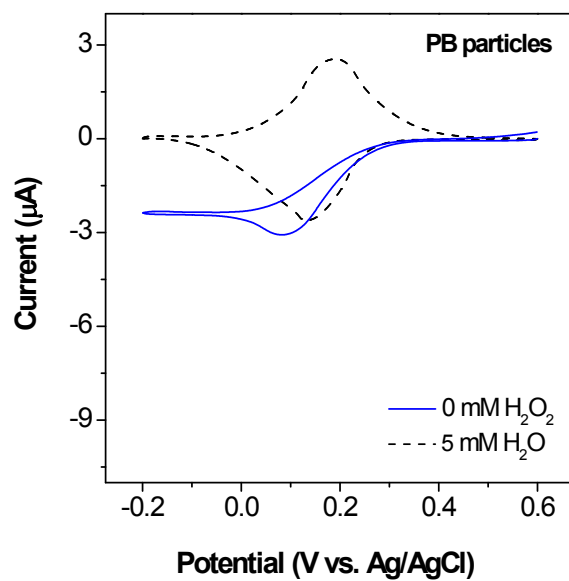

**Fig. S2** Cyclic voltammogram of conventional PB particles decorated electrode in 20 mM sodium phosphate buffer solution in the absence (dashed curves) and the presence of 5 mM H<sub>2</sub>O<sub>2</sub> (solid curves). Scan rate: 50 mV s<sup>-1</sup>, under N<sub>2</sub>.
